# Supplementary material for: Mass Spectrometry-Based Proteomic Discovery of Prognostic Biomarkers in Adrenal Cortical Carcinoma
Source: MDPI journal article supplement (doi:10.3390/cancers13153890), 2021-08-02
Supplement: s1 [file s1]

Supplementary Materials

Mass Spectrometry-Based Proteomic Discovery of Prognostic Biomarkers in Adrenal Cortical Carcinoma

Han Na Jang, Sun Joon Moon, Kyeong Cheon Jung, Sang Wan Kim, Hyeyoon Kim, Dohyun Han and Jung Hee Kim

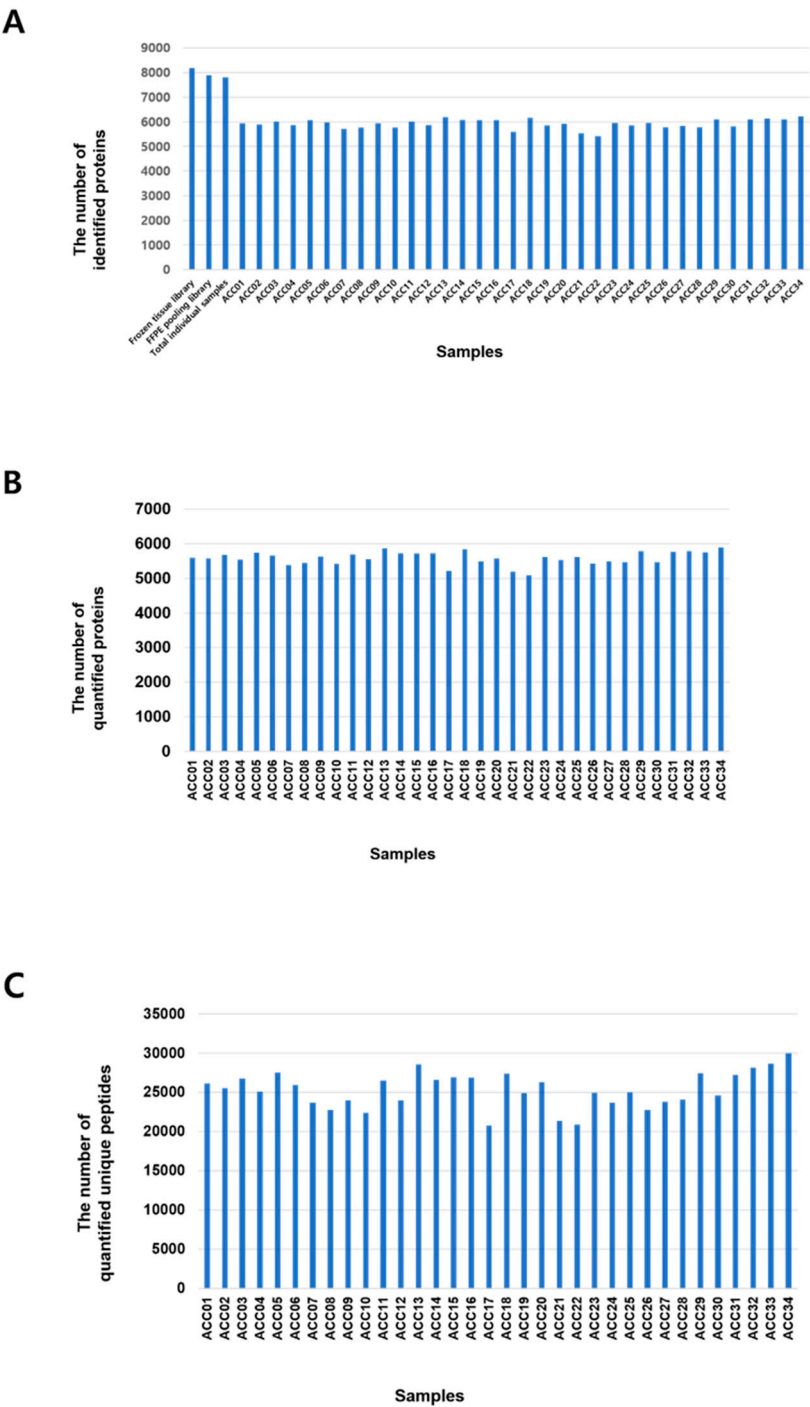

**Figure S1.** The number of proteins identified with a false discovery rate (FDR) < 1% at PSM and protein level. The numbers of identified proteins, quantified proteins, and quantified unique peptides in ACC tissues 1 to 34 were shown. ACC—adrenal cortical carcinoma.

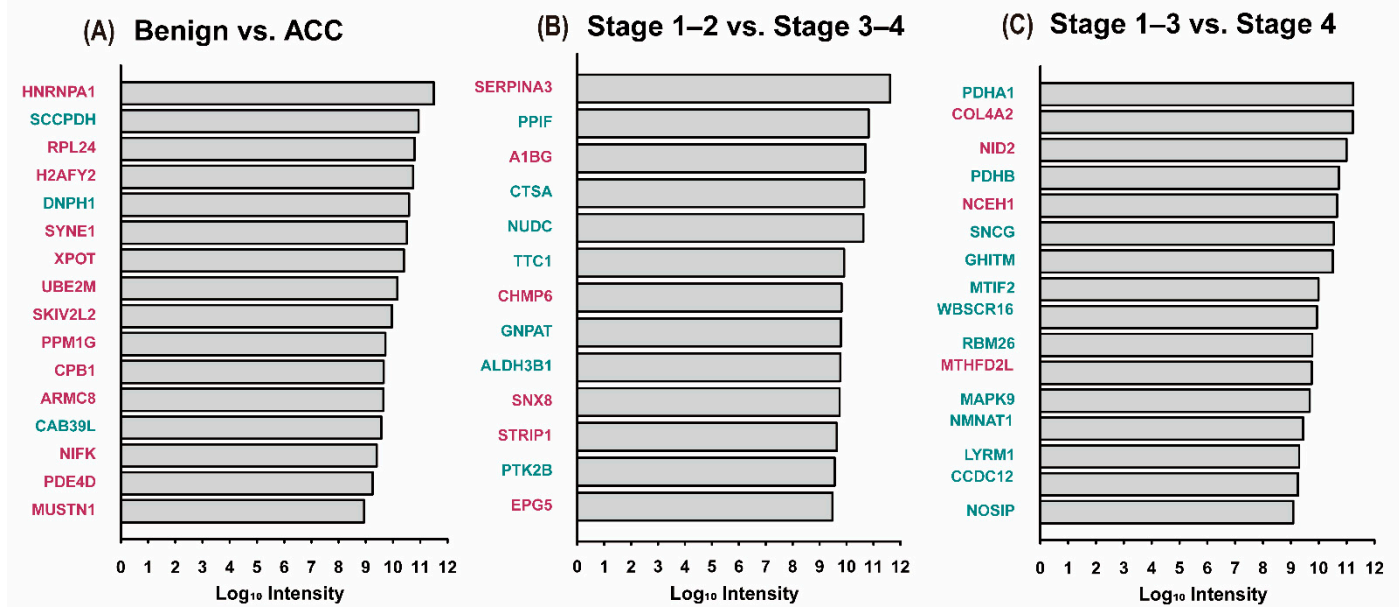

**Figure S2.** Signal intensity of feature selected proteins. The expression levels of feature-selected proteins obtained through ReliefF, infoGain, and ANOVA are presented. **(A)** Feature-selected proteins identified in adrenal adenoma are indicated in green, while proteins identified in ACC are indicated in red. **(B)** Feature-selected proteins identified in stages 1–2 ACC are indicated in green, while proteins identified in stages 3–4 ACC are indicated in red. **(C)** Feature-selected proteins identified in stages 1–3 ACC are indicated in green, while proteins identified in stage 4 ACC are indicated in red. A1BG—alpha-1-B glycoprotein; ACC—adrenal cortical carcinoma; ALDH3B1—aldehyde dehydrogenase 3 family member B1; ARMC8—armadillo repeat containing 8; CAB39L—calcium binding protein 39 like; CCDC12—coiled-coil domain containing 12; CHMP6—charged multivesicular body protein 6; COL4A2—collagen type IV alpha 2 chain; CPB1—carboxypeptidase B1; CTSA—cathepsin A; DNPH1—2'-deoxynucleoside 5'-phosphate N-hydrolase 1; EPG5—ectopic P-granules autophagy protein 5 homolog; GHITM—growth hormone inducible transmembrane protein; GNPAT—glyceronephosphate O-acyltransferase; H2AFY2—H2A histone family member Y2; HNRNPA1—heterogeneous nuclear ribonucleoprotein A1; LYRM1—LYR motif containing 1; MAPK9—mitogen-activated protein kinase 9; MTHFD2L—methyl-enetetrahydrofolate dehydrogenase (NADP<sup>+</sup> dependent) 2 like; MTIF2—mitochondrial translational initiation factor 2; MUSTN1—musculoskeletal, embryonic nuclear protein 1; NCEH1—neutral cholesterol ester hydrolase 1; NID2—nidogen 2; NIFK—nucleolar protein interacting with the FHA domain of MKI67; NMNAT1—nicotinamide nucleotide adenyltransferase 1; NOSIP—nitric oxide synthase interacting protein; NUDC—nuclear distribution C, dynein complex regulator; PDE4D—phosphodiesterase 4D; PDHA1—pyruvate dehydrogenase E1 alpha 1 subunit; PDHB—pyruvate dehydrogenase E1 beta subunit; PPIF—peptidylprolyl isomerase F; PPM1G—protein phosphatase, Mg<sup>2+</sup>/Mn<sup>2+</sup> dependent 1G; PTK2B—protein tyrosine kinase 2 beta; RBM26—RNA binding motif protein 26; RPL24—ribosomal protein L24; SCCPDH—saccharopine dehydrogenase; SERPINA3—serpin family A member 3; SKIV2L2—superkiller viralicidic activity 2-like 2; SNCG—synuclein gamma; SNX8—sorting nexin 8; STRIP1—striatin interacting protein 1; SYNE1—spectrin repeat containing nuclear envelope protein 1; TTC1—tetratricopeptide repeat domain 1; UBE2M—ubiquitin conjugating enzyme E2 M; WBSCR16—williams-Beuren syndrome chromosome region 16; XPOT—exportin for tRNA.

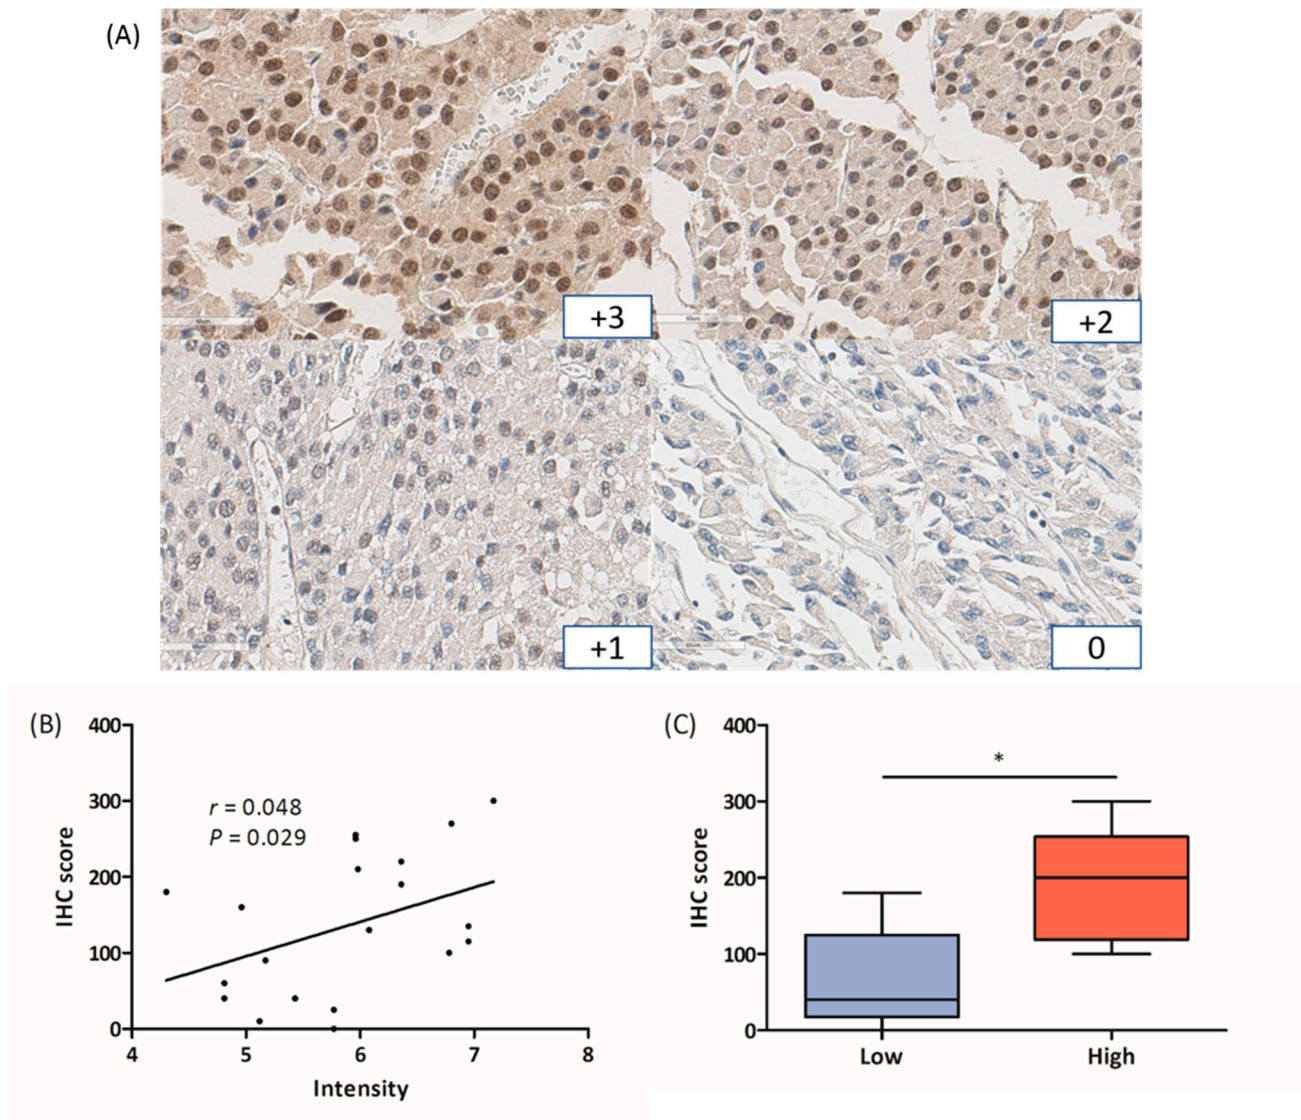

**Figure S3.** Immunohistochemistry staining of HNRNPA1 in ACC tissue, scatter plot between HNRNPA1 expression intensity in proteomics and IHC score and difference in IHC score according to the expression level of HNRNPA1 (A) Immunohistochemistry staining was performed with HNRNPA1, which is known to be associated with the poor prognosis of ACC in this study and also with poor prognosis in other tumors. Scoring was performed according to the degree of nuclear staining, and the area % corresponding to each score was indicated to calculate the IHC score. (B) The correlation between the expression level of HNRNPA1 analyzed by mass spectrometry and the score in IHC staining was analyzed. There was a significant correlation between the two in Spearman's analysis ( $r = 0.048$ ,  $p = 0.029$ ). (C) Tissues were classified as low and high to the degree of expression of HNRNPA1 in mass spectrometry, and differences in IHC scores were analyzed. When Mann-Whitney analysis was performed, there was a significant difference in IHC score between the low expression group and the high expression group ( $p = 0.002$ ). A significant difference in IHC score was indicated by \* between the group with the low and high HNRNPA1 expression levels. ACC, adrenal cortical carcinoma; HNRNPA1—heterogeneous nuclear ribonucleoprotein A1; IHC, immunohistochemistry.

**Table S2.** IPA analyses for benign vs. ACC (Canonical pathway).

| Pathway                                                               | $-\text{Log}_{10} p$ | Z Score |
|-----------------------------------------------------------------------|----------------------|---------|
| Fatty Acid $\beta$ -oxidation I                                       | 4.15                 | -1.414  |
| Glioma Signaling                                                      | 4.11                 | 1.000   |
| Sirtuin Signaling Pathway                                             | 3.84                 | 1.706   |
| Valine Degradation I                                                  | 3.82                 | -2.449  |
| Ethanol Degradation II                                                | 3.61                 | -1.890  |
| Noradrenaline and Adrenaline Degradation                              | 3.31                 | -2.646  |
| Leucine Degradation I                                                 | 3.23                 | -2.000  |
| Serotonin Degradation                                                 | 2.89                 | -1.667  |
| Oxidative Phosphorylation                                             | 2.78                 | -1.941  |
| Methylglyoxal Degradation III                                         | 2.55                 | -2.000  |
| Apoptosis Signaling                                                   | 2.53                 | 1.155   |
| Thrombopoietin Signaling                                              | 2.47                 | 1.000   |
| Isoleucine Degradation I                                              | 2.42                 | -2.000  |
| ErbB4 Signaling                                                       | 2.33                 | 1.000   |
| Superpathway of Citrulline Metabolism                                 | 2.30                 | 2.000   |
| Oxidative Ethanol Degradation III                                     | 2.30                 | -1.000  |
| Tumoricidal Function of Hepatic Natural Killer Cells                  | 2.27                 | 2.000   |
| Glycolysis I                                                          | 2.27                 | 2.236   |
| TWEAK Signaling                                                       | 2.25                 | 1.633   |
| $\alpha$ -Adrenergic Signaling                                        | 2.25                 | 1.414   |
| RhoA Signaling                                                        | 2.20                 | -1.941  |
| Insulin Receptor Signaling                                            | 2.20                 | -1.069  |
| Granzyme B Signaling                                                  | 2.19                 | 2.000   |
| Acute Phase Response Signaling                                        | 2.19                 | 2.324   |
| Glutathione-mediated Detoxification                                   | 2.19                 | -2.236  |
| G Beta Gamma Signaling                                                | 2.17                 | 1.387   |
| Small Cell Lung Cancer Signaling                                      | 2.12                 | -1.342  |
| VEGF Family Ligand-Receptor Interactions                              | 2.11                 | 1.265   |
| Putrescine Degradation III                                            | 2.09                 | -2.000  |
| Induction of Apoptosis by HIV1                                        | 2.07                 | 1.134   |
| NER Pathway                                                           | 1.95                 | 2.530   |
| Tryptophan Degradation X (Mammalian, via Tryptamine)                  | 1.91                 | -2.000  |
| Ethanol Degradation IV                                                | 1.91                 | -1.000  |
| Intrinsic Prothrombin Activation Pathway                              | 1.85                 | 1.633   |
| EGF Signaling                                                         | 1.77                 | 1.890   |
| Prolactin Signaling                                                   | 1.76                 | 1.000   |
| Salvage Pathways of Pyrimidine Ribonucleotides                        | 1.75                 | 1.265   |
| Ovarian Cancer Signaling                                              | 1.75                 | -1.134  |
| UVA-Induced MAPK Signaling                                            | 1.70                 | -1.667  |
| Glutathione Redox Reactions I                                         | 1.69                 | -1.000  |
| Dopamine Degradation                                                  | 1.62                 | -2.000  |
| SAPK/JNK Signaling                                                    | 1.59                 | 1.265   |
| NF- $\kappa$ B Signaling                                              | 1.58                 | 1.291   |
| TNFR1 Signaling                                                       | 1.54                 | 1.633   |
| Gluconeogenesis I                                                     | 1.50                 | 2.000   |
| Phospholipase C Signaling                                             | 1.48                 | 1.500   |
| Pyridoxal 5'-phosphate Salvage Pathway                                | 1.44                 | 1.134   |
| Regulation of Cellular Mechanics by Calpain Protease                  | 1.44                 | -2.000  |
| Type I Diabetes Mellitus Signaling                                    | 1.44                 | 1.633   |
| ErbB Signaling                                                        | 1.42                 | 1.000   |
| Production of Nitric Oxide and Reactive Oxygen Species in Macrophages | 1.42                 | 1.069   |
| Neuregulin Signaling                                                  | 1.39                 | 1.000   |

Pathways with  $p$  values  $< 0.05$  are presented and ordered by  $\text{Log}_{10} p$  values. ACC—adrenal cortical carcinoma; EGF—epidermal growth factor; ErbB4—Erb-b2 receptor tyrosine kinase 4; ErbB—erythroblastic leukemia viral oncogene homolog; IPA—ingenuity pathway analysis; MAPK—mitogen-activated protein kinase; NER—nucleotide excision repair; NF- $\kappa$ B—nuclear factor kappa B; SAPK/JNK—stress-activated protein kinase/c-Jun N-terminal kinase; TNFR1—tumor necrosis factor receptor 1; TWEAK—TNF-Like Weak Inducer of Apoptosis; UVA-ultraviolet A; VEGF—vascular endothelial growth factor.

**Table S3.** IPA analyses for stage 1–2 vs. stage 3–4 (Canonical pathway).

| Pathway                                                               | Log <sub>10</sub> <i>p</i> | Z Score |
|-----------------------------------------------------------------------|----------------------------|---------|
| Acute Phase Response Signaling                                        | 22.30                      | 2.524   |
| LXR/RXR Activation                                                    | 21.60                      | 4.017   |
| TCA Cycle II (Eukaryotic)                                             | 4.57                       | −2.449  |
| Production of Nitric Oxide and Reactive Oxygen Species in Macrophages | 4.55                       | 3.873   |
| GP6 Signaling Pathway                                                 | 3.05                       | 3.162   |
| Valine Degradation I                                                  | 2.99                       | −2.000  |
| Superpathway of Methionine Degradation                                | 1.90                       | −1.000  |
| Inhibition of Matrix Metalloproteases                                 | 1.78                       | −1.000  |
| Glioma Invasiveness Signaling                                         | 1.41                       | 1.342   |
| Apoptosis Signaling                                                   | 1.37                       | −1.633  |

Pathways with *p* values < 0.05 are presented and ordered by Log<sub>10</sub> *p* values. GP6—Glycoprotein VI; IPA, ingenuity pathway analysis; LXR/RXR—Liver X Receptor-Retinoid X Receptor; TCA—tricarboxylic acid cycle.

**Table S4.** IPA analyses for stage 1–3 vs. stage 4 (Canonical pathway).

| Pathway                                 | Log <sub>10</sub> <i>p</i> | Z Score |
|-----------------------------------------|----------------------------|---------|
| Glutaryl-CoA Degradation                | 3.87                       | −2.000  |
| Tryptophan Degradation III (Eukaryotic) | 3.14                       | −2.000  |
| tRNA Charging                           | 3.04                       | −2.236  |
| GP6 Signaling Pathway                   | 2.63                       | 2.121   |
| Fatty Acid β-oxidation I                | 2.54                       | −2.000  |
| Oxidative Phosphorylation               | 2.31                       | −1.890  |
| Induction of Apoptosis by HIV1          | 2.16                       | −1.342  |
| Leukocyte Extravasation Signaling       | 1.79                       | 1.000   |

Pathways with *p* values < 0.05 are presented and ordered by Log<sub>10</sub> *p* values. GP6—Glycoprotein VI; HIV1—human immunodeficiency virus-1; IPA, ingenuity pathway analysis.

**Table S5.** Baseline characteristics of TCGA study subjects.

| Variables              | ACC ( <i>n</i> = 78) |
|------------------------|----------------------|
| Age                    | 46.7 ± 15.8          |
| Male                   | 31 (39.7)            |
| Initial Stage (ENSAT)  | -                    |
| I                      | 9 (11.5)             |
| II                     | 37 (47.4)            |
| III                    | 16 (20.5)            |
| IV                     | 14 (17.9)            |
| Death                  | 27 (34.6)            |
| Follow-up, years (IQR) | 3.3 (2.0–5.6)        |

There were 2 missing values in Stage. ACC, adrenal cortical carcinoma; ENSAT, European Network for the Study of Adrenal Tumor; IQR, interquartile range; TCGA, The Cancer Genome Atlas.

**Table S6.** Comparison of baseline characteristics of SNUH cohort and TCGA study.

| Variables              | ACC ( <i>n</i> = 37) | ACC ( <i>n</i> = 78) | <i>p</i> -Value |
|------------------------|----------------------|----------------------|-----------------|
| Age                    | 48.5 ± 12.9          | 46.7 ± 15.8          | 0.663           |
| Male                   | 15 (40.5)            | 31 (39.7)            | 0.935           |
| Initial Stage (ENSAT)  | -                    | -                    | -               |
| I                      | 2 (5.4)              | 9 (11.5)             | -               |
| II                     | 7 (18.9)             | 37 (47.4)            | -               |
| III                    | 17 (45.9)            | 16 (20.5)            | 0.004           |
| IV                     | 11 (29.7)            | 14 (17.9)            | -               |
| Death                  | 19 (51.4)            | 27 (34.6)            | -               |
| Follow-up, years (IQR) | 4.0 (1.3–8.1)        | 3.3 (2.0–5.6)        | 0.596           |

ACC, adrenal cortical carcinoma; ENSAT, European Network for the Study of Adrenal Tumor; IQR, interquartile range; TCGA, The Cancer Genome Atlas.

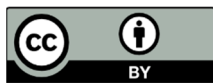

© 2021 by the authors. Licensee MDPI, Basel, Switzerland. This article is an open access article distributed under the terms and conditions of the Creative Commons Attribution (CC BY) license (<http://creativecommons.org/licenses/by/4.0/>).
